# Supplementary material
Source: PubMed Central journal article supplement (PMC4380653)

a 5A short exposure  
membrane cut

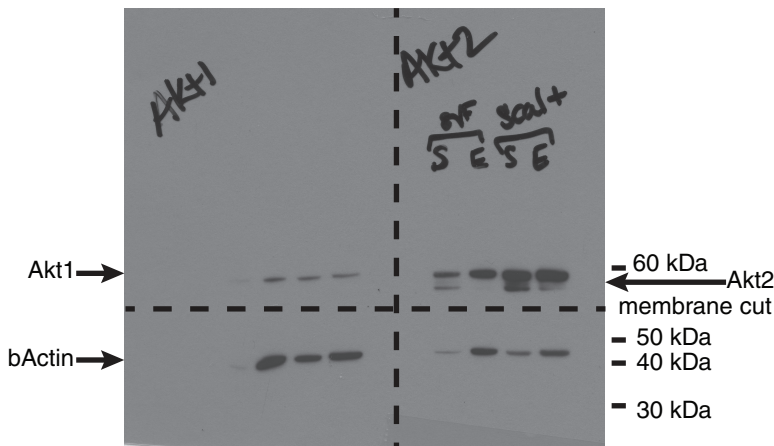

b 5A long exposure  
membrane cut

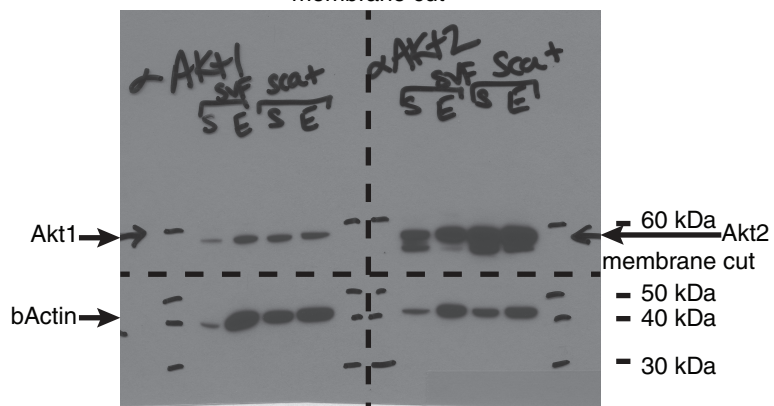

c 5B top panel, short exposure

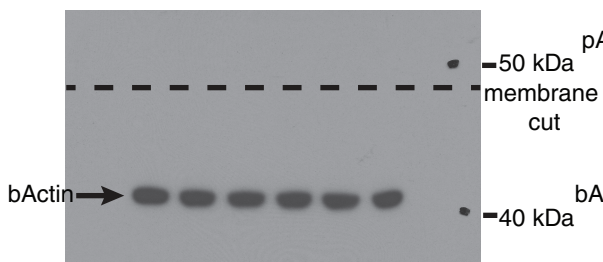

d 5B top panel, long exposure

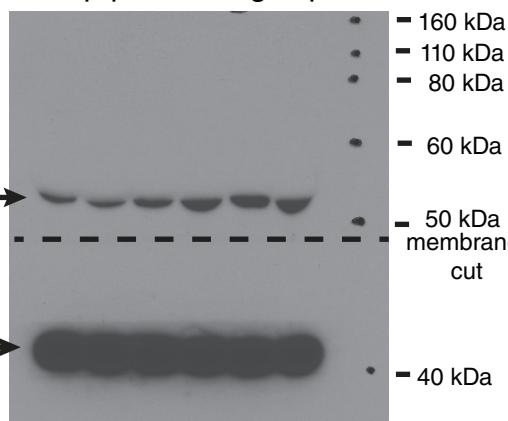

e 5B top panel

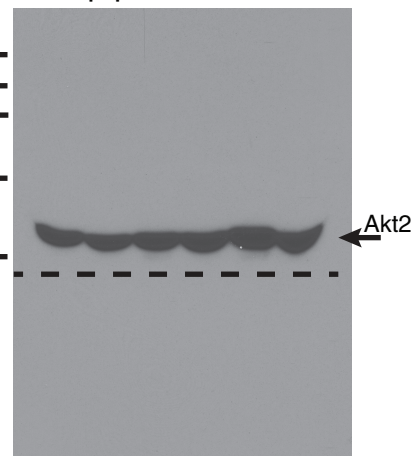

f 5B bottom panel, short exposure

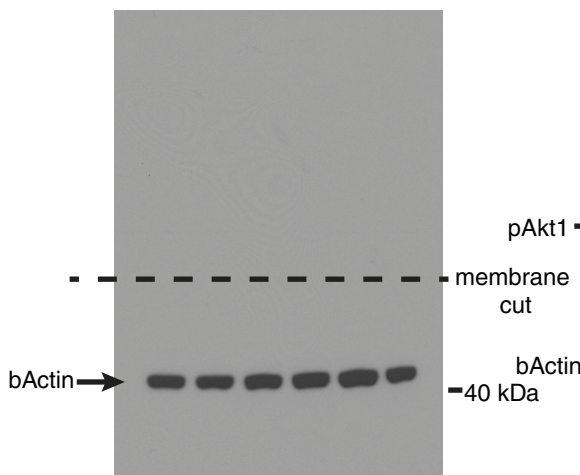

g 5B bottom panel, long exposure

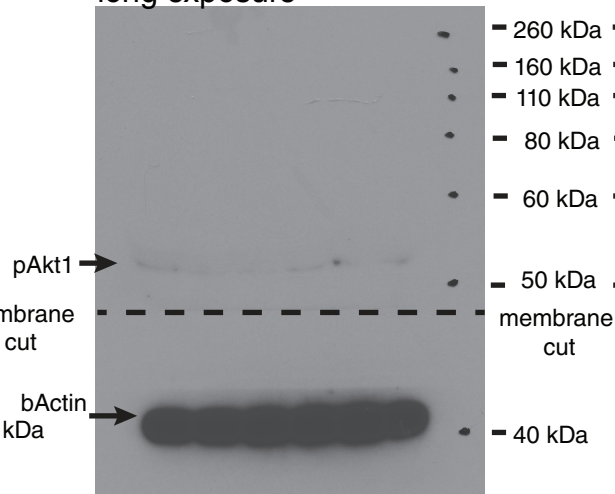

h 5B bottom panel

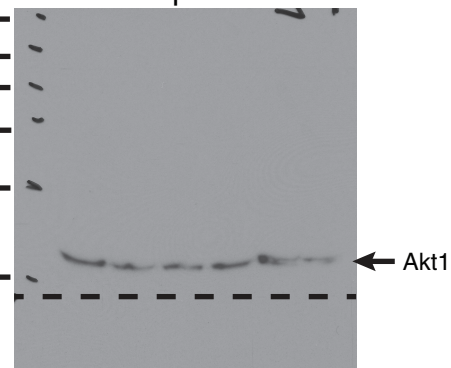

i

Supplementary 3A top panel

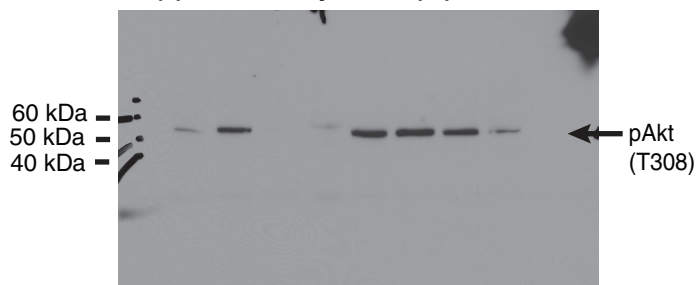

j

Supplementary 3A top panel

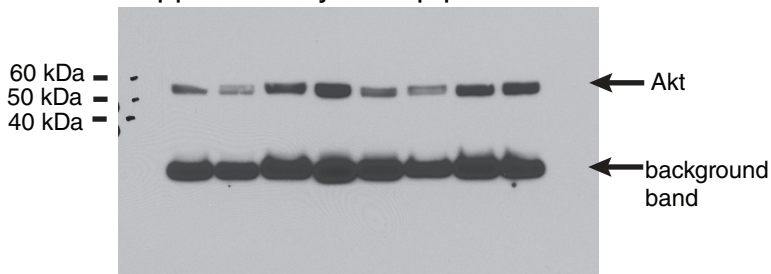

k

Supplementary 3A bottom panel

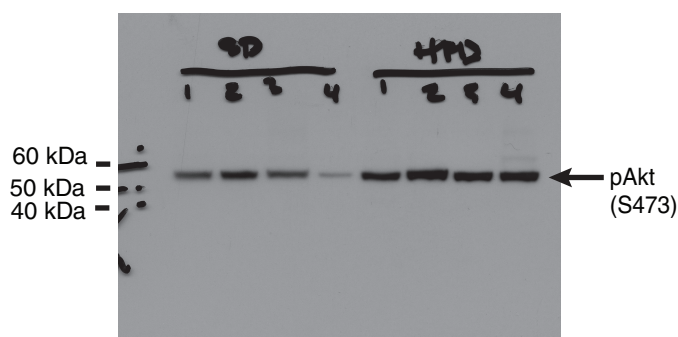

l

Supplementary 3A bottom panel

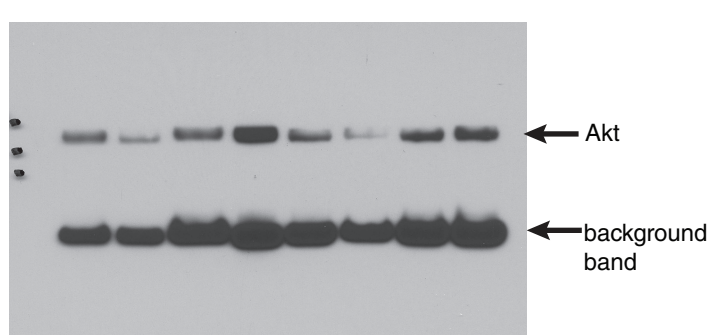

m

Supplementary 3E bottom panel, short exposure

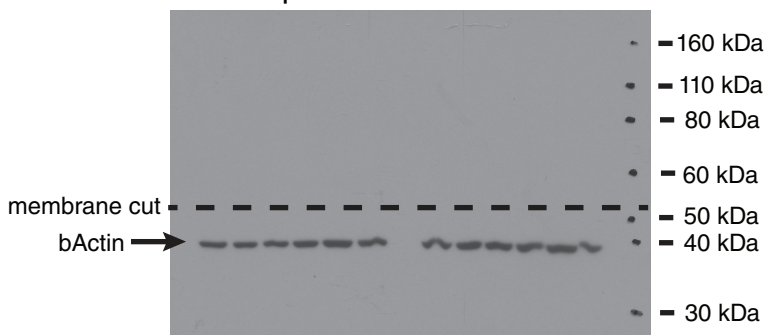

n

Supplementary 3E bottom panel, long exposure

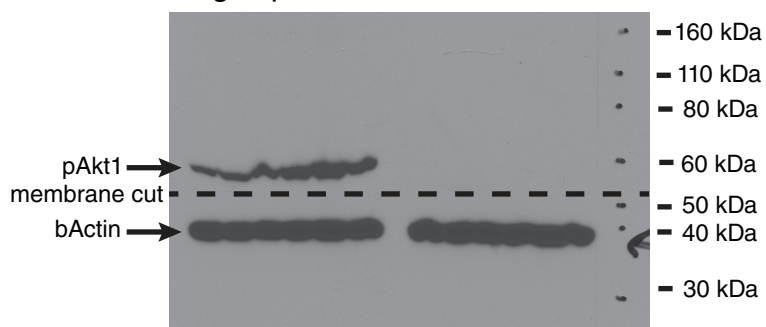

Supplement: NIHMS657340-supplement-7.pdf [file NIHMS657340-supplement-7.pdf]
